# Supplementary material for: Magnetic force-based multiplexed immunoassay using superparamagnetic nanoparticles in microfluidic channel
Source: Royal Society of Chemistry journal article supplement (doi:10.1039/b502225h), 2005-01-01
Supplement: b502225h.doc [file b502225h.doc]

**Supplementary** **data**

Magnetic force-based multiplexed immunoassay using superparamagnetic nanoparticles in microfluidic channel

Kyu Sung Kim and Je-Kyun Park*

*Department of BioSystems, Korea Advanced Institute of Science and Technology (KAIST),*

*373-1 Guseong-dong, Yuseong-gu, Daejeon 305-701, Korea*

*E-mail address: jekyun@kaist.ac.kr*

The magnetic fields outside a rectangular magnet were determined by following eqs1:

(1) (2)

where **B*x*** and **B*y*** is magnetic field in the direction of *x*-axis and *y*-axis, respectively, *0* is the vacuum permeability, *Ms* is a magnetization of the magnet and (*x1*, *x2*), (*y1*, *y2*) and (*z1*, *z2*) denote the positions of the edges of the magnet with respect to the *x*-, *y*-, *z*-axes. The magnet is magnetization along *z*-axis. The magnetic fields and magnetic field gradients were evaluated using above eq 1 and eq 2 using MATLAB (The MathWorks, MA). We set *x1* = -50, *x2* = 0, *y1* = 0, *y2* = 25, *z1* = 0, *z2* = 10 mm and *Ms* = 9.0 × 106 A m-1 (Fig. 1a). As shown in Fig. 1b and 1c, we evaluate **B*x*** and **B*y*** across a surface from (1, 0) to (7, 25) at *z* = 1 mm. The magnetic fields were over 0.2 T. These values were enough to saturate magnetization of iron oxide magnetic nanoparticles.2-4 Therefore, the velocities of microbeads conjugated with magnetic nanoparticles are proportional to the magnetic field gradient, **B**. The magnetic field gradients, *d***B***x****/****dx* at *y* = 10 mm and *d***B***y/dy* at *x* = 2 mm, were calculated. As shown in Fig. 1d and 1e, the magnetic field gradient along y-axis, *d***B***y/dy*, is much less than the magnetic field gradient along x-axis, *d***B***x/dx*. Therefore, the effect of the magnetic field gradient along y-axis, *d***B***y/dy*, could be nearly ignored.

References

1 E. P. Furlani, *Permanent Magnet & Electromechanical Devices: Materials, Analysis, and Applications*, Academic Press, San Diego, 2001.

2 M. D. Mukadam, S. M. Yusuf, P. Sharma and S. K. Kulshreshtha, *J. Magn. Magn. Mater.,* 2004, **272-276**, 1401-1403.

3 Z. Z. Xu, C. C. Wang, W. L. Yang, Y. H. Deng and S. K. Fu, *J. Magn. Magn. Mater.*, 2004, **277**, 136-143.

4 D. K. Kim, Y. Zhang, W. Voit, K. V. Rao and M. Muhammed, *J. Magn. Magn. Mater.,* 2001, **225**, 30-36.

(a)


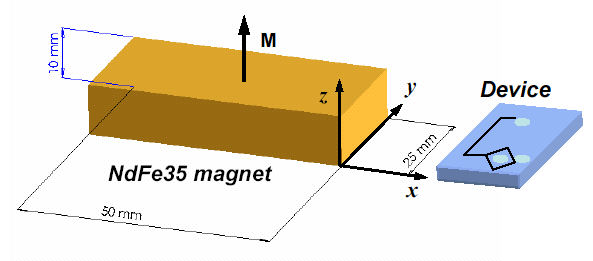


(b) (c)


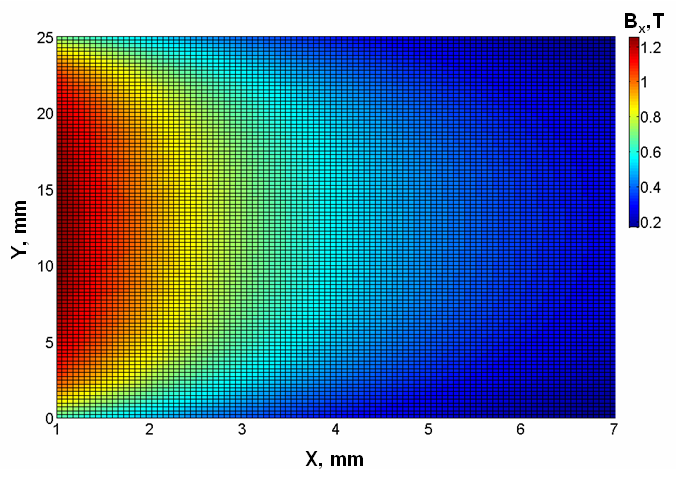

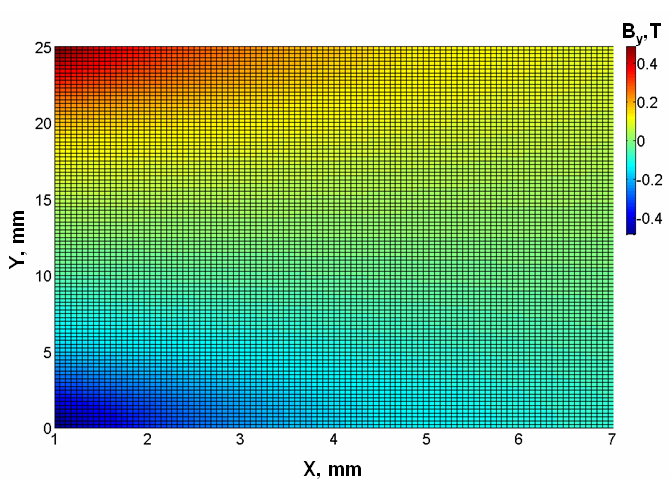


(d) (e)


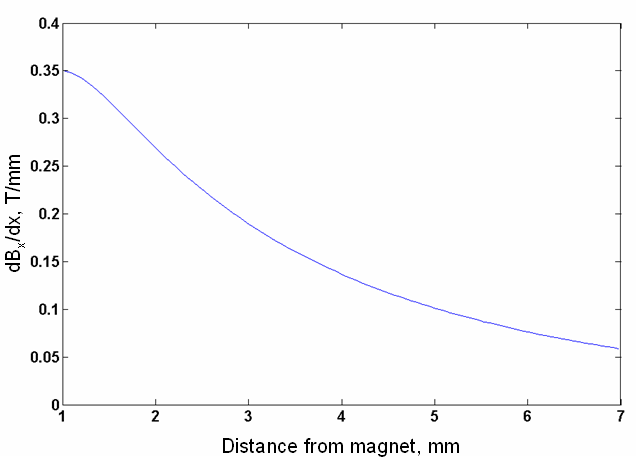

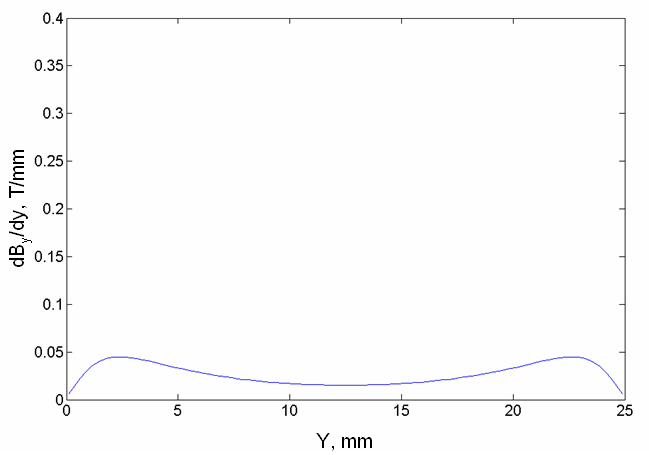


**Fig. 1** (a) Scheme of a NdFe35 permanent magnet and the location of a microfluidic device from the permanent magnet. (b) The evaluated magnetic field along x-axis by NdFe35 permanent magnet across a surface from (1, 0) to (7, 25) at *z* = 1 mm. The channel of microfluidic device was aligned from *y* = 7.5 mm to *y* = 12.5 mm at *x* = 1, 2, 3, 4, 5, 6, 7 mm and *z* = 1 mm. (c) The evaluated magnetic field along y-axis by NdFe35 permanent magnet across a surface from (1, 0) to (7, 25) at *z* = 1 mm. The channel of microfluidic device was aligned from *y* = 7.5 mm to *y* = 12.5 mm at *x* = 1, 2, 3, 4, 5, 6, 7 mm and *z* = 1 mm. (d) Calculated values of the magnetic field gradient in the x-direction, *d*B*x/dx*, at *y* = 10 mm and *z* = 1 mm. (e) Calculated values of the magnetic field gradient in the y-direction, *d*B*y/dy*, at *x* = 2 mm and *z* = 1 mm.
